# Supplementary material
Source: PubMed Central journal article supplement (PMC6248132)
Supplement: jama-320-1889-s002.pdf [file jama-320-1889-s002.pdf]

## Supplementary Online Content

Martin PR, Tamblyn RM, Benedetti A, Ahmed S, Tannenbaum C. Effect of a pharmacist-led educational intervention on inappropriate medication prescriptions in older adults: the D-PRESCRIBE randomized clinical trial. *JAMA*. doi:10.1001/jama.2018.16131

### **Supplement 2.** eTable

This supplementary material has been provided by the authors to give readers additional information about their work.

Prevalence, risk difference and relative risk for discontinuation of inappropriate prescriptions at 6-month follow-up (Per-Protocol analysis)

1  
2  
3

\*95% CI's were calculated using robust standard error

| Outcome                                                             | Intervention Group<br>No. (%) | Control Group<br>No. (%) | Absolute risk difference %<br>(95% CI)* | Number-needed-to-treat | Relative Risk<br>(95% CI) | Intra-cluster correlation |
|---------------------------------------------------------------------|-------------------------------|--------------------------|-----------------------------------------|------------------------|---------------------------|---------------------------|
| <b><u>Main Outcome:</u></b>                                         |                               |                          |                                         |                        |                           |                           |
| <b>Discontinuation of inappropriate prescriptions – All classes</b> |                               |                          |                                         |                        |                           |                           |
|                                                                     | 99/219<br>(45.2)              | 25/218<br>(11.5)         | 34<br>(26 - 41)                         | 2.94                   | 3.94<br>(2.7 - 5.9)       | 0.001                     |
| <b><u>Secondary Outcomes<sup>a</sup>:</u></b>                       |                               |                          |                                         |                        |                           |                           |
| <b>Discontinuation of sedative hypnotic prescriptions</b>           |                               |                          |                                         |                        |                           |                           |
|                                                                     | 58/124<br>(46.7)              | 11/138<br>(8.0)          | 38<br>(29 - 48)                         | 2.63                   | 5.86<br>(3.2 - 10.7)      | 0.002                     |
| <b>Discontinuation of glyburide prescriptions</b>                   |                               |                          |                                         |                        |                           |                           |
|                                                                     | 17/58<br>(29.31)              | 8/53<br>(15.1)           | 14<br>(-2 to 28)                        | 7.14                   | 0.94<br>(-0.1 to 3.1)     | 0.005                     |
| <b>Discontinuation of NSAID prescriptions</b>                       |                               |                          |                                         |                        |                           |                           |
|                                                                     | 19/30<br>(63.3)               | 5/22<br>(22.7)           | 41<br>(13 - 60)                         | 2.46                   | 1.78<br>(.2 - 5.3)        | 0.011                     |

<sup>a</sup> As the N for first generation Antihistamines was too small; a sub-group analysis was not feasible.

4  
5  
6
