# Supplementary material
Source: PubMed Central journal article supplement (PMC6248132)
Supplement: jama-320-1889-s003.pdf [file jama-320-1889-s003.pdf]

## Supplementary Online Content

Martin PR, Tamblyn RM, Benedetti A, Ahmed S, Tannenbaum C. Effect of a pharmacist-led educational intervention on inappropriate medication prescriptions in older adults: the D-PRESCRIBE randomized clinical trial. *JAMA*. doi:10.1001/jama.2018.16131

This supplementary material has been provided by the authors to give readers additional information about their work.

### Data Sharing Statement

#### Data

**Data available:** Yes

**Data types:** Deidentified participant data

**How to access data:** cara.tannenbaum@umontreal.ca

**When available:** With publication

### Supporting Documents

**Document types:** None

### Additional Information

**Who can access the data:** anyone requesting the data

**Types of analyses:** for a specified purpose

**Mechanisms of data availability:** after approval of a proposal
